# An Optimized Circular Polymerase Extension Reaction-based Method for Functional Analysis of SARS-CoV-2

GuanQun Liu\* and Michaela U. Gack\*

Florida Research and Innovation Center, Cleveland Clinic, Port St. Lucie, Florida, USA

\*Correspondence: [LIUG2@ccf.org](mailto:LIUG2@ccf.org) (G.L.); [gackm@ccf.org](mailto:gackm@ccf.org) (M.U.G.)

## SUMMARY

Reverse genetics systems have been crucial for studying specific viral genes and their relevance in the virus lifecycle, and become important tools for the rational attenuation of viruses and thereby for vaccine design. Recent rapid progress has been made in the establishment of reverse genetics systems for functional analysis of SARS-CoV-2, a coronavirus that causes the ongoing COVID-19 pandemic that has resulted in detrimental public health and economic burden. Among the different reverse genetics approaches, CPER (circular polymerase extension reaction) has become one of the leading methodologies to generate recombinant SARS-CoV-2 infectious clones due to its accuracy, efficiency, and flexibility. Here, we report an optimized CPER methodology which, through the use of a modified linker plasmid and by performing DNA nick ligation and direct transfection of permissive cells, overcomes certain intrinsic limitations of the 'traditional' CPER approaches for SARS-CoV-2, allowing for efficient virus rescue. This optimized CPER system may facilitate research studies to assess the contribution of SARS-CoV-2 genes and individual motifs or residues to virus replication, pathogenesis and immune escape, and may also be adapted to other viruses.

## 25 INTRODUCTION

26 Functional analysis of individual viral genes including embedded motifs and individual  
27 residues has been essential for understanding key functions of viruses such as viral entry,  
28 genome amplification, or escape from innate or adaptive immunity. Key to these studies has  
29 been the establishment of viral reverse genetics systems, which allow investigation of viral gene  
30 functions through mutagenesis [1, 2]. In addition, reverse genetics approaches for generating  
31 mutant recombinant viruses have become important for the rational design of replication-  
32 impaired, so-called “live-attenuated” viruses, which may represent vaccine candidates.  
33 Moreover, reverse genetics technologies enable studying viral evasion of antibody responses  
34 (e.g. by the coronaviral spike protein) and thereby aid in mRNA vaccine design [3]. Therefore,  
35 the development of efficient and accurate methodologies for generating viral infectious clones  
36 including recombinant mutant viruses has not only become an integral component of  
37 fundamental virology research, but also has great value for translational research and the  
38 design of novel vaccines [4].

39 SARS-CoV-2, a member of the large family of *Coronaviridae*, emerged in Wuhan, China,  
40 in late 2019 and then spread rapidly across the globe where it has caused substantial morbidity  
41 and mortality as well as severe economic losses [5]. SARS-CoV-2 is one of the largest RNA  
42 viruses. Its positive-sense genome is ~30 kb long and comprises a defined organization that  
43 encodes for ~30 gene products or proteins [6]. Since the emergence of SARS-CoV-2, rapid  
44 progress has been made in understanding how individual viral proteins or enzymes (e.g. spike  
45 protein or the RNA-dependent RNA polymerase) fulfill key functions in the viral lifecycle such as  
46 mediating virus entry and immune evasion or genome amplification. Studies to characterize viral  
47 proteins in isolation – either through ectopic expression in mammalian cells or by *in vitro*  
48 analysis following protein purification – have tremendously enhanced our understanding of how  
49 SARS-CoV-2 proteins function and provided important insight into their catalytic activities or

50 interactions with host-cell factors or other viral proteins. However, the engineering of mutant  
51 recombinant viruses in which specific genes/residues are deleted or mutated has been essential  
52 for determining how relevant individual genes or specific motifs/residues are for virus infection,  
53 pathogenesis or immune evasion. The large genome size of SARS-CoV-2 has hampered the  
54 development of plasmid-based reverse genetics systems for this virus (and also other  
55 coronaviruses) that have been used for many other RNA viruses (*i.e.* influenza and flaviviruses)  
56 [4]. Therefore, bacterial artificial chromosome (BAC)-based technologies (typically used for  
57 mutagenesis of large DNA viruses such as herpesviruses), *in vitro* cDNA fragment ligation, and  
58 yeast-based synthetic biology approaches have been traditionally used for generating  
59 recombinant coronaviruses including SARS-CoV-2 [7-15].

60 In 2021, the adaptation of a circular polymerase extension reaction (CPEP)-based  
61 approach, which has been successfully used for construction of flavivirus infectious clones [16],  
62 was reported for the generation of recombinant SARS-CoV-2 [17, 18]. Advantages of the CPEP  
63 method include high-fidelity preservation of viral genome sequences with minimal or no  
64 unwanted mutations, as compared to the BAC and *in vitro* ligation methodologies which can  
65 introduce inexplicable insertions or deletions during bacterial propagation steps. Additionally,  
66 CPEP allows for flexibility in viral sequence manipulation by PCR-based mutagenesis, while the  
67 BAC methodology relies on *de novo* assembly or homologous recombination in special bacterial  
68 systems. Furthermore, the straightforward and streamlined workflow of CPEP allows for  
69 infectious clone construction in a single-tube reaction, which is in sharp contrast to BAC cloning  
70 and *in vitro* ligation of cDNA fragments that require cumbersome procedures and complex  
71 experimental techniques.

72 Integral to the CPEP technology is PCR-based amplification of cDNA fragments that  
73 cover the complete viral genome (30 kb in the case of SARS-CoV-2) and carry overlapping  
74 sequences. With the use of a 'linker' fragment that connects the viral 5' and 3' untranslated

75 regions (UTRs) with functional mammalian transcription initiation and termination elements, the  
76 individual cDNA fragments are extended in a single PCR reaction to assemble into a  
77 circularized full-length viral cDNA clone. The circularized cDNA clone is then delivered (typically  
78 by transfection) into mammalian cells, leading to the intracellular synthesis of viral genomic RNA  
79 and, ultimately, the production of infectious virus. Although the CPER platform has already  
80 greatly facilitated studies to functionally characterize SARS-CoV-2 genes and specific  
81 mutations, some intrinsic limitations still exist that hamper the robustness and efficiency of virus  
82 rescue.

83 Here, we report an optimized CPER methodology for reverse genetics engineering of  
84 SARS-CoV-2. Specifically, we utilized a modified linker plasmid, added a new step of ligating  
85 DNA nicks, and also applied direct transfection of the circularized infectious cDNA clone into  
86 highly permissive cells, which resulted in more rapid rescue of the virus and efficient viral yields.

87

## 88 **RESULTS**

### 89 **Optimization of the CPER approach for efficient SARS-CoV-2 rescue**

90 The CPER method builds principally on overlap extension PCR that fuses several  
91 double-stranded DNA (dsDNA) fragments containing 20- to 50-bp homologous ends into one  
92 large fragment [19]. Compared to the traditional overlap extension PCR, which uses a set of two  
93 distal primers to facilitate the generation of the combined fragment, CPER does not amplify  
94 fragments using such primers but instead utilizes an additional fragment that overlaps with the  
95 first and the last fragment to be joined, thereby circularizing the self-primed and extended  
96 dsDNA product. In CPER-based bacterial cloning, this additional fragment is typically a  
97 linearized plasmid vector generated by restriction digestion or PCR. As a result, the CPER  
98 product resembles a relaxed circular plasmid with staggered nicks which locate to the 5' end of

99 each strand of the individual fragment following the respective ‘round-the-horn’ amplification, as  
100 commonly seen in the QuikChange® approach of site-directed mutagenesis [20].

101         Adaptation of the CPER approach to *de novo* assembly of infectious clones for positive-  
102 strand RNA viruses is primarily achieved by substituting a linker fragment for the linearized  
103 vector used in CPER-mediated plasmid cloning. The design of the linker fragment draws  
104 inspiration from plasmid-launched mRNA synthesis driven by the mammalian RNA polymerase  
105 II (Pol II) promoter, as the genomes of several positive-sense RNA viruses including flaviviruses  
106 and coronaviruses contain a 5' cap structure like cellular mRNAs and undergo cap-dependent  
107 translation. In addition to the Pol II promoter, the linker fragment also contains a polyadenylation  
108 signal for transcription termination and, importantly, a self-cleaving ribozyme sequence in front  
109 of the poly(A) signal to ensure accurate processing of the 3' end of the RNA transcript to match  
110 the authentic viral genome sequence. Notably, while the linker fragment is usually cloned into a  
111 plasmid for long-term maintenance in *E. coli*, only the portion containing the mammalian  
112 transcription elements, but not the bacterial propagation cassettes, is amplified and used in  
113 CPER assembly.

114         Despite the successful adaptation of the CPER technology for the generation of  
115 infectious clones, CPER has a major intrinsic limitation, which is the presence of staggered  
116 nicks that impede efficient expression in mammalian cells. Whereas nicked plasmids are known  
117 to be seamlessly repaired upon transformation into *E. coli*, the precise fate of a circularized,  
118 nick-containing dsDNA inside a mammalian cell remains elusive. The presence of nicks in the  
119 template strand can cause Pol II pausing and likely also template misalignment, which may  
120 eventually lead to unwanted mutations [21]. In CPER-derived infectious clones, the circular  
121 template strand extended from each fragment contains a nick, which, depending on the genome  
122 segmentation scheme used for assembly, locates to different coding or noncoding regions of the  
123 viral genome. Although the sequence contexts in which the nicks situate may permit Pol II

124 bypassing, how the template discontinuity affects the overall Pol II transcription efficiency, and  
125 hence the synthesis of full-length viral genomes, in mammalian cells remains unclear.

126 Another limitation of the current CPER approaches for SARS-CoV-2 rescue lies in the  
127 choice of cell lines for transfection of the CPER product [17, 18]. While HEK293-derived cell  
128 lines have been successfully used for reverse genetics systems for a variety of viruses from  
129 diverse families due to their robust transfectability, the use of HEK293 cells for SARS-CoV-2  
130 rescue can be less efficient because of the unique cellular tropism of the virus and the critical  
131 host factors required for virus entry and replication. To date, three mammalian cell lines are  
132 commonly used for *in vitro* propagation of SARS-CoV-2 to high titers. These include Vero E6  
133 (African green monkey kidney epithelial), Caco-2 (human colonic epithelial), and Calu-3 (human  
134 lung epithelial) cells. All three cell lines express the receptor for SARS-CoV-2, angiotensin-  
135 converting enzyme 2 (ACE2), while the latter two express also transmembrane serine protease  
136 2 (TMPRSS2), a critical early entry cofactor [22]. In addition to priming direct cell membrane  
137 fusion, the presence of TMPRSS2 safeguards the integrity of the polybasic furin cleavage site in  
138 the viral spike gene, which is selectively deleted during serial passaging in Vero E6 cells due to  
139 viral host adaptation [23]. To this end, Vero E6 cells stably expressing human TMPRSS2 (Vero  
140 E6-TMPRSS2) have been widely used for the propagation of ancestral and emerging SARS-  
141 CoV-2 strains including the variants of concern (VOCs). More importantly, given the nature that  
142 Vero cells lack interferon (IFN) production [24], it remains the first-line cell system for generating  
143 and propagating recombinant mutant viruses that are attenuated through selective ablation of  
144 viral gene functions that evade or antagonize IFN-mediated antiviral innate immunity (e.g.  
145 SARS-CoV-2 papain-like protease (PLpro) which is an IFN antagonist [25, 26]).

146 Taking these limitations into account, we rationally optimized CPER for SARS-CoV-2 by  
147 adding new steps to seal the nicks in the CPER product and by using a modified linker plasmid  
148 as well as a different cell line for transfection of the CPER product (**Figure 1A**). Specifically,

149 under the same genome segmentation scheme reported by Torii *et al.* [18], gel-purified viral  
150 cDNA fragments were phosphorylated at the 5' end by using a T4 polynucleotide kinase. Equal  
151 molar amounts of the phosphorylated fragments were then subjected to CPER assembly using  
152 the cycling 'condition 3' as described previously [18]. Immediately before transfection, the nicks  
153 in the CPER product were sealed by using a high-fidelity and thermostable Taq DNA ligase that  
154 joins the extended 3'-OH terminus with its originating 5'-phosphorylated terminus, giving rise to  
155 a closed circular cDNA infectious clone. Then, the sealed CPER product was directly  
156 transfected into a monolayer of Vero E6-TMPRSS2 cells by using the *TransIT-X2* dynamic  
157 delivery system (**Figure 1A**). Furthermore, to ensure efficient Pol II termination and to prevent  
158 Pol II read-through in the linker region, which may confound ribozyme processing at the  
159 transcript 3' end or interfere with new transcription initiation, we also replaced the 'spacer'  
160 sequence that is located between the poly(A) signal and CMV enhancer/promoter with a  
161 functional Pol II transcriptional pause signal from the human  $\alpha 2$  globin gene known to minimize  
162 promoter crosstalk [27]. The resultant linker sequence was assembled with ampicillin resistance  
163 and origin of replication cassettes into a high-copy plasmid, named "pGL-CPERlinker" (**Figure**  
164 **1B**).

165 Using the newly optimized CPER workflow, infectious virus generated using as a  
166 template a BAC construct encoding a GFP reporter SARS-CoV-2 [11] could be rescued as early  
167 as day 3 post-transfection, as evidenced by the formation of GFP-positive syncytia (**Figure 1C**).  
168 By day 5 post-transfection, massive cytopathic effects (CPE) could be observed. In comparison,  
169 successful virus rescue using the 'classical' CPER approach was not observed until day 5 post-  
170 transfection (**Figure 1C**), similar to previous reports [17, 18]. Therefore, the optimized CPER  
171 workflow can accelerate SARS-CoV-2 rescue by at least 2 days.

172 **Cloning-free SARS-CoV-2 rescue and characterization of the CPER-derived recombinant**  
173 **viruses**

174 We also applied the optimized CPER approach to rescue SARS-CoV-2 from purified  
175 viral genomic RNA [17]. Adopting again the 10-fragment scheme reported by Torii *et al.* [18], we  
176 successfully achieved specific amplification of all fragments from the first-strand cDNA that was  
177 synthesized from purified viral genomic RNAs of three different virus strains, including the  
178 ancestral strain WA1 and two VOCs (*i.e.* Beta and Omicron) (**Figure 2A**). We also performed  
179 site-directed mutagenesis directly in the purified fragment #2 by overlap extension PCR using  
180 the pair of primers for fragment #2 amplification (**Figure 2A**) and a pair of mutagenesis primers,  
181 and could readily obtain the new mutant fragment #2 for all three viruses (**Figure 2B**).  
182 Successful rescue of the WA1 and Beta viruses, as evidenced by CPE, was consistently  
183 observed between day 3 and day 4, and the passage 0 (P0) stocks were typically harvested on  
184 day 4 or day 5 when CPE was >90%. The use of Vero E6-TMPRSS2 cells ensured the integrity  
185 of the furin cleavage site, as confirmed by sequencing of independently-rescued viruses (**Figure**  
186 **2C**). The CPER-derived recombinant viruses also displayed the same plaque morphology as  
187 their parental isolates (**Figure 2D**), and the P0 virus titers consistently reached  $\sim 10^6$  PFU/mL  
188 (**Figure 2E**).

189

## 190 **DISCUSSION**

191 CPER-based approaches offer considerable advantages over other reverse genetics  
192 systems for engineering positive-strand recombinant viruses harboring large genomes of >10  
193 kb. First, they are PCR-based and better preserve viral genome sequences than plasmids or  
194 large DNA constructs (*i.e.* BACs) which require bacterial amplification. Second, CPER allows for  
195 manipulation of viral genome sequences via flexible PCR strategies with high accuracy,  
196 enabling rapid and reliable generation of recombinant mutant infectious clones for functional  
197 analysis of viral genes and specific motifs.



198           The herein-reported optimized CPER system, which was developed as part of our  
199 continuous efforts to define the role of SARS-CoV-2 genes in innate immune evasion (in  
200 particular, Nsp3 and its PLpro de-ISGylation activity) ([26] and Gack lab, unpublished data),  
201 addressed key limitations of the traditional CPER approaches that can compromise the  
202 robustness and efficiency of SARS-CoV-2 rescue. We provided proof of concept that, with the  
203 implementation of additional or modified steps – 5' end phosphorylation, nick sealing, direct  
204 transfection into permissive cells – and through the use of a modified linker plasmid, SARS-  
205 CoV-2 rescue can be accelerated. At this point, we have not yet systematically determined  
206 which one(s) of these specific steps is functionally most important for the CPER optimization. It  
207 is conceivable that the combination of the new practices leads to successful virus rescue in a  
208 short time.

209           This optimized approach allowed for the accurate generation of reporter viruses and  
210 recombinant VOC strains, which displayed similar replication capacities as their respective  
211 parental viruses. The described optimization steps may be readily adapted also to other  
212 positive-strand RNA viruses such as other coronaviruses or alphaviruses, flaviviruses, and  
213 noroviruses. Further optimization of the reported workflow may be achieved by combining  
214 CPER and nick ligation in one reaction and by using other permissive cells (e.g. Caco-2) for  
215 transfection of the CPER product. Moreover, although the genome segmentation scheme and  
216 primer sets used in our studies (previously reported by Torri *et al.*) conform to the genome  
217 sequences of the selected Beta and Omicron strains, further optimization of the fragment  
218 scheme and primer locations could be attempted, considering phylogenetic analysis of  
219 sequence conservation, to achieve a universal set of primers that can be applied to all VOCs  
220 and emerging viral strains. It is also important to deep-sequence CPER-derived recombinant  
221 viruses and those generated by other reverse genetics systems, which would allow comparing  
222 the overall fidelity of different virus rescue approaches.

223 Our optimized CPER method may promote the functional analysis of recombinant  
224 viruses to evaluate viral determinants of pathogenesis, immune evasion and transmission. It  
225 could also be useful for the efficient generation of replication-‘crippled’ viruses that may serve as  
226 live-attenuated vaccines with potentially higher efficacy than currently available COVID-19  
227 vaccines. The optimized CPER approach described herein may also facilitate the incorporation  
228 of mechanism-based mutations that serve as built-in safety features (e.g. mutations in the Nsp1  
229 gene and transcriptional regulatory sequence (TRS) [28, 29]) when studying certain viral  
230 variants or mutants.

231

232 **Additional comments regarding ethics and biosafety.** Safe handling of viral agents such as  
233 SARS-CoV-2 is of utmost importance. Work with SARS-CoV-2 including recombinant viruses  
234 engineered using CPER (or other reverse genetics) approaches requires adequate biosafety  
235 biocontainment and is subject to institutional, local and/or federal regulations. Considering the  
236 ongoing debates about the dissemination of methods for reverse engineering of SARS-CoV-2  
237 (see for example [30]), we consciously described in detail only the newly developed optimization  
238 steps of the CPER method, while mostly referring to published reports for the other steps of the  
239 CPER approach.

## 240 **MATERIALS AND METHODS**

### 241 **Biosafety**

242 SARS-CoV-2 genomic RNA extraction, cDNA synthesis, CPER transfection, and live  
243 virus experiments were all conducted in the BSL-3 facility of the Cleveland Clinic Florida  
244 Research and Innovation Center (CC-FRIC). Sterility-tested viral cDNA was handled in a BSL-2  
245 laboratory following standard biosafety practices and procedures. All work was reviewed and  
246 approved by the CC-FRIC Institutional Biosafety Committee in accordance with the National  
247 Institutes of Health (NIH) Guidelines.

### 248 **Cells and viruses**

249 Vero E6 (#CRL-1586) and HEK293T (#CRL-3216) cells were purchased from the  
250 American Type Culture Collection (ATCC) and were maintained in Dulbecco's modified Eagle's  
251 medium (DMEM, Gibco) supplemented with 10% fetal bovine serum (FBS, Gibco), 2 mM L-  
252 Glutamine (Gibco), 1 mM sodium pyruvate (Gibco) and 100 U/mL of penicillin–streptomycin  
253 (Gibco). Vero E6 cells stably expressing human TMPRSS2 were generated by lentiviral  
254 transduction followed by selection with blasticidin (40 µg/mL; Invivogen). SARS-CoV-2 strains  
255 hCoV-19/USA-WA1/2020 (NR-52281), hCoV-19/USA/MD-HP01542/2021 (Lineage B.1.351;  
256 Beta variant) (NR-55282), and hCoV-19/USA/MD-HP20874/2021 (Lineage B.1.1.529; Omicron  
257 variant) (NR-56461) were obtained from BEI Resources, National Institute of Allergy and  
258 Infectious Diseases (NIAID), NIH.

### 259 **Viral genomic RNA purification and first-strand cDNA synthesis**

260 Viral genomic RNA was purified from 280 µL virus-containing media using the QIAamp  
261 Viral RNA Mini Kit (Qiagen) as per the manufacturer's instructions and eluted in 60 µL nuclease-  
262 free water. Reverse transcription for first-strand cDNA synthesis was performed by using the  
263 LunaScript RT SuperMix Kit (NEB) containing both oligo(dT) and random primers in a reaction

264 consisting of 10  $\mu$ L genomic RNA, 4  $\mu$ L 5 $\times$  SuperMix and 6  $\mu$ L nuclease-free water with the  
265 cycling condition as follows: 2 min at 25°C, 20 min at 55°C, and 1 min at 95°C. One microliter of  
266 RNase H (5 U; Thermo Scientific) was subsequently added and the reaction mix was incubated  
267 at 37°C for 20 min.

## 268 **DNA constructs**

269 The bacterial artificial chromosome (BAC) encoding a GFP reporter SARS-CoV-2 in the  
270 background of hCoV-19/Germany/BY-pBSCoV2-K49/2020 (GISAID EPI\_ISL\_2732373) was  
271 kindly provided by Armin Ensser (Friedrich-Alexander University Erlangen-Nürnberg, Germany)  
272 and has been described previously [11]. pGL-CPERlinker was assembled from synthetic DNA  
273 oligonucleotides and fragments (IDT) as well as the ampicillin resistance cassette and the origin  
274 of replication derived from pUC19 (NEB).

## 275 **CPER reaction and transfection**

276 To amplify the 10 viral cDNA fragments (either from BAC or the first-strand viral genomic  
277 cDNA), previously reported primer sets were used [18]. The primers for amplification of the  
278 linker fragment from pGL-CPERlinker are: GL-CPERlinkF (5'-  
279 CTTAGGAGAATGACAAAAAAAAAAAAAAAAAAAAAAAAAAGGCCGGCATGGTCCCAGCC-  
280 3') and GL-CPERlinkR (5'-  
281 GTTACCTGGGAAGGTATAAACCTTTAATACGGTTCCTAAACGAGCTCTGCTTATATAG-3').  
282 Amplification of each fragment was carried out by using the PrimeSTAR Max DNA polymerase  
283 (Takara Bio) in a 50  $\mu$ L PCR reaction containing 0.2  $\mu$ M each primer and 1 ng BAC or 2  $\mu$ L viral  
284 cDNA as the template with the cycling condition as follows: 10 s at 98°C; 35 cycles of 10 s at  
285 98°C, 5 s at 55°C, 25 s at 72°C; and 2 min at 72°C. All PCR products were gel purified by using  
286 the Monarch DNA Gel Extraction Kit (NEB) and eluted in 20  $\mu$ L nuclease-free water. The  
287 purified fragments were then 5' phosphorylated in a 50  $\mu$ L reaction containing 10 U of T4

288 polynucleotide kinase (NEB) and cleaned up through the Monarch PCR & DNA Cleanup spin  
289 columns (NEB). CPER assembly was performed as previously described by combining 0.05  
290 pmol of each fragment in a 50  $\mu$ L reaction containing 2.5 U PrimeSTAR GXL DNA polymerase  
291 (Takara Bio) and using the 'condition 3' cycling parameters [18]. Immediately before  
292 transfection, the CPER product was subject to post-PCR nick sealing for 30 min at 50°C and 30  
293 min at 60°C in a 25  $\mu$ L reaction containing 1 mM  $\beta$ -nicotinamide adenine dinucleotide (NAD<sup>+</sup>)  
294 (NEB) and 0.5  $\mu$ L HiFi Taq DNA ligase (NEB). The final CPER product was transfected into  
295 Vero E6-TMPRSS2 cells seeded into 6-well plates ( $\sim 5 \times 10^5$  cells per well) by using the  
296 *TransIT-X2* Dynamic Delivery System (Mirus Bio) as per the manufacturer's instructions. After  
297 24 hours, the culture media was replaced with DMEM containing 2% FBS, 2 mM L-Glutamine, 1  
298 mM sodium pyruvate, 1 $\times$  non-essential amino acids (Gibco), 10 mM HEPES (Gibco), and 100  
299 U/mL of penicillin–streptomycin. For the classical CPER method, the unsealed CPER product  
300 was first transfected into HEK293T cells by using *TransIT-LT1* (Mirus Bio), and the trypsinized  
301 cells were then overlaid onto Vero E6-TMPRSS2 cells at 6 hours post-transfection, as  
302 previously described [17].

### 303 **Virus titration and sequencing**

304 The titers of the P0 virus stocks were determined by plaque assay. Briefly, a monolayer-  
305 culture system of Vero E6-TMPRSS2 cells was incubated with ten-fold serially diluted virus-  
306 containing media. The inoculum was removed after 2 hours, and the cell monolayers were  
307 washed twice with PBS and then overlaid with 1% colloidal microcrystalline cellulose (Sigma) in  
308 MEM containing 2% FBS, 2 mM L-Glutamine, 1 $\times$  non-essential amino acids, 10 mM HEPES,  
309 and 100 U/mL of penicillin–streptomycin. Plaques were visualized by Coomassie Blue staining  
310 on day 3. For P0 virus sequencing, viral genomic RNA was purified and the first-strand cDNA  
311 was synthesized as described above. Nine fragments encompassing the whole genome [31]

312 were then amplified from the cDNA and subsequently subjected to Sanger (Azenta Life  
313 Sciences) or Nanopore sequencing (Plasmidsaurus).

314 **AUTHOR CONTRIBUTIONS**

315 G.L. designed and performed all experiments and analyzed the data. M.U.G. supervised the  
316 study. G.L. and M.U.G. wrote the manuscript.

317

318 **ACKNOWLEDGEMENTS**

319 This study was funded, in part, by the US National Institutes of Health grant R37 AI087846 (to  
320 M.U.G.). We greatly thank Armin Ensser (Friedrich-Alexander University Erlangen-Nürnberg) for  
321 providing reagents.

322

323 **DECLARATION OF INTERESTS**

324 The authors declare no competing interests.

325 **FIGURE LEGENDS**

326 **FIGURE 1. Generation of recombinant SARS-CoV-2 by using an optimized CPER**  
327 **methodology.**

328 (A) Schematic of the optimized CPER system that includes new or modified steps including 5'  
329 end phosphorylation, nick ligation, as well as direct transfection of permissive cells with the  
330 CPER product. Specifically, the nine overlapping cDNA fragments (F1–F9/10) covering the full-  
331 length SARS-CoV-2 genome were phosphorylated at the 5' end using T4 polynucleotide kinase  
332 (PNK) before being subjected to CPER assembly using a modified linker fragment (as illustrated  
333 in B). The circularized CPER product was then sealed at the staggered nicks by DNA ligation  
334 using HiFi *Taq* DNA ligase, and the closed circular infectious cDNA clone was transfected into  
335 Vero E6-TMPRSS2 cells for virus rescue. 'P' indicates phosphorylation.

336 (B) Map of the linker plasmid (pGL-CPERlinker) in which the hepatitis delta virus (HDV)  
337 ribozyme, bovine growth hormone polyadenylation signal (bGH polyA), RNA polymerase II (Pol  
338 II) transcription pause signal, and human cytomegalovirus (CMV) enhancer and promoter were  
339 assembled together with the ampicillin resistance (AmpR) cassette and the origin of replication  
340 (Ori) derived from the pUC19 plasmid (NEB).

341 (C) Comparison of the optimized CPER system with the original method as described by  
342 Amarilla *et al.* [17] by rescuing a GFP reporter virus. GFP-positive syncytia were evident as  
343 early as day 3 and day 5 post-transfection of the CPER product into Vero E6-TMPRSS2 cells,  
344 respectively. Scale bar, 100  $\mu$ m.

345

346 **FIGURE 2. Cloning-free generation and characterization of CPER-derived recombinant**  
347 **SARS-CoV-2.**



348 **(A)** Representative gel images of the overlapping cDNA fragments amplified from purified  
349 SARS-CoV-2 genomic RNAs of the indicated virus strains. The primer sets described by Torii *et*  
350 *al.* [18] conform to the genome sequences of the ancestral strain (WA1) and the selected Beta  
351 and Omicron variants of concern (VOCs) with 100% complementarity. MM, molecular marker.

352 **(B)** Schematic of the overlapping PCR strategy for site-directed mutagenesis in fragment 2 by  
353 using purified PCR product as a template (top panel), as well as representative gel images of  
354 the intermediate (2.1 and 2.2) and final (2<sup>mut</sup>) PCR products (bottom panel). MM, molecular  
355 marker.

356 **(C)** Sequencing confirmation of the integrity of the spike furin cleavage site of the passage 0  
357 (P0) virus stocks from three independent virus rescues using the optimized CPER approach. aa,  
358 amino acids; nt, nucleotides.

359 **(D)** Plaque morphology on Vero E6-TMPRSS2 cells of recombinant Beta (rBeta) generated by  
360 optimized CPER as well as of its parental virus.

361 **(E)** Virus titers of the P0 stocks of CPER-derived recombinant WA1 (rWA1) and rBeta, collected  
362 at day 5 and day 4 post-transfection of the CPER product, respectively ( $n = 4$ ).

363 REFERENCES

- 364 1. Palese P, Zheng H, Engelhardt OG, Pleschka S, Garcia-Sastre A: **Negative-strand**  
365 **RNA viruses: genetic engineering and applications.** *Proc Natl Acad Sci U S A* 1996,  
366 **93**:11354-11358.
- 367 2. Aubry F, Nougairède A, Gould EA, de Lamballerie X: **Flavivirus reverse genetic**  
368 **systems, construction techniques and applications: a historical perspective.**  
369 *Antiviral Res* 2015, **114**:67-85.
- 370 3. Liu J, Liu Y, Xia H, Zou J, Weaver SC, Swanson KA, Cai H, Cutler M, Cooper D, Muik A,  
371 et al: **BNT162b2-elicited neutralization of B.1.617 and other SARS-CoV-2 variants.**  
372 *Nature* 2021, **596**:273-275.
- 373 4. Stobart CC, Moore ML: **RNA virus reverse genetics and vaccine design.** *Viruses*  
374 2014, **6**:2531-2550.
- 375 5. Hu B, Guo H, Zhou P, Shi ZL: **Characteristics of SARS-CoV-2 and COVID-19.** *Nat*  
376 *Rev Microbiol* 2021, **19**:141-154.
- 377 6. V'Kovski P, Kratzel A, Steiner S, Stalder H, Thiel V: **Coronavirus biology and**  
378 **replication: implications for SARS-CoV-2.** *Nat Rev Microbiol* 2021, **19**:155-170.
- 379 7. Almazan F, Dediego ML, Galan C, Escors D, Alvarez E, Ortego J, Sola I, Zuniga S,  
380 Alonso S, Moreno JL, et al: **Construction of a severe acute respiratory syndrome**  
381 **coronavirus infectious cDNA clone and a replicon to study coronavirus RNA**  
382 **synthesis.** *J Virol* 2006, **80**:10900-10906.
- 383 8. Yount B, Curtis KM, Fritz EA, Hensley LE, Jahrling PB, Prentice E, Denison MR,  
384 Geisbert TW, Baric RS: **Reverse genetics with a full-length infectious cDNA of**  
385 **severe acute respiratory syndrome coronavirus.** *Proc Natl Acad Sci U S A* 2003,  
386 **100**:12995-13000.
- 387 9. Scobey T, Yount BL, Sims AC, Donaldson EF, Agnihothram SS, Menachery VD,  
388 Graham RL, Swanstrom J, Bove PF, Kim JD, et al: **Reverse genetics with a full-length**  
389 **infectious cDNA of the Middle East respiratory syndrome coronavirus.** *Proc Natl*  
390 *Acad Sci U S A* 2013, **110**:16157-16162.
- 391 10. Terada Y, Kuroda Y, Morikawa S, Matsuura Y, Maeda K, Kamitani W: **Establishment of**  
392 **a Virulent Full-Length cDNA Clone for Type I Feline Coronavirus Strain C3663.** *J*  
393 *Virol* 2019, **93**.
- 394 11. Herrmann A, Jungnickl D, Cordsmeier A, Peter AS, Uberla K, Ensser A: **Cloning of a**  
395 **Passage-Free SARS-CoV-2 Genome and Mutagenesis Using Red Recombination.**  
396 *Int J Mol Sci* 2021, **22**.
- 397 12. Thi Nhu Thao T, Labrousseau F, Ebert N, V'Kovski P, Stalder H, Portmann J, Kelly J,  
398 Steiner S, Holwerda M, Kratzel A, et al: **Rapid reconstruction of SARS-CoV-2 using a**  
399 **synthetic genomics platform.** *Nature* 2020, **582**:561-565.
- 400 13. Xie X, Muruato A, Lokugamage KG, Narayanan K, Zhang X, Zou J, Liu J, Schindewolf  
401 C, Bopp NE, Aguilar PV, et al: **An Infectious cDNA Clone of SARS-CoV-2.** *Cell Host*  
402 *Microbe* 2020, **27**:841-848 e843.
- 403 14. Ye C, Chiem K, Park JG, Oladunni F, Platt RN, 2nd, Anderson T, Almazan F, de la Torre  
404 JC, Martinez-Sobrido L: **Rescue of SARS-CoV-2 from a Single Bacterial Artificial**  
405 **Chromosome.** *mBio* 2020, **11**.
- 406 15. Rihn SJ, Merits A, Bakshi S, Turnbull ML, Wickenhagen A, Alexander AJT, Baillie C,  
407 Brennan B, Brown F, Bruncker K, et al: **A plasmid DNA-launched SARS-CoV-2 reverse**  
408 **genetics system and coronavirus toolkit for COVID-19 research.** *PLoS Biol* 2021,  
409 **19**:e3001091.
- 410 16. Edmonds J, van Grinsven E, Prow N, Bosco-Lauth A, Brault AC, Bowen RA, Hall RA,  
411 Khromykh AA: **A novel bacterium-free method for generation of flavivirus**

- 412 **infectious DNA by circular polymerase extension reaction allows accurate**  
413 **recapitulation of viral heterogeneity.** *J Virol* 2013, **87**:2367-2372.
- 414 17. Amarilla AA, Sng JDJ, Parry R, Deerain JM, Potter JR, Setoh YX, Rawle DJ, Le TT,  
415 Modhiran N, Wang X, et al: **A versatile reverse genetics platform for SARS-CoV-2**  
416 **and other positive-strand RNA viruses.** *Nat Commun* 2021, **12**:3431.
- 417 18. Torii S, Ono C, Suzuki R, Morioka Y, Anzai I, Fauzyah Y, Maeda Y, Kamitani W,  
418 Fukuhara T, Matsuura Y: **Establishment of a reverse genetics system for SARS-**  
419 **CoV-2 using circular polymerase extension reaction.** *Cell Rep* 2021, **35**:109014.
- 420 19. Quan J, Tian J: **Circular polymerase extension cloning of complex gene libraries**  
421 **and pathways.** *PLoS One* 2009, **4**:e6441.
- 422 20. Xia Y, Chu W, Qi Q, Xun L: **New insights into the QuikChange process guide the**  
423 **use of Phusion DNA polymerase for site-directed mutagenesis.** *Nucleic Acids Res*  
424 2015, **43**:e12.
- 425 21. Agapov A, Olina A, Kulbachinskiy A: **RNA polymerase pausing, stalling and bypass**  
426 **during transcription of damaged DNA: from molecular basis to functional**  
427 **consequences.** *Nucleic Acids Res* 2022, **50**:3018-3041.
- 428 22. Chu H, Chan JF, Yuen TT, Shuai H, Yuan S, Wang Y, Hu B, Yip CC, Tsang JO, Huang  
429 X, et al: **Comparative tropism, replication kinetics, and cell damage profiling of**  
430 **SARS-CoV-2 and SARS-CoV with implications for clinical manifestations,**  
431 **transmissibility, and laboratory studies of COVID-19: an observational study.**  
432 *Lancet Microbe* 2020, **1**:e14-e23.
- 433 23. Johnson BA, Xie X, Bailey AL, Kalveram B, Lokugamage KG, Muruato A, Zou J, Zhang  
434 X, Juelich T, Smith JK, et al: **Loss of furin cleavage site attenuates SARS-CoV-2**  
435 **pathogenesis.** *Nature* 2021, **591**:293-299.
- 436 24. Osada N, Kohara A, Yamaji T, Hirayama N, Kasai F, Sekizuka T, Kuroda M, Hanada K:  
437 **The genome landscape of the african green monkey kidney-derived vero cell line.**  
438 *DNA Res* 2014, **21**:673-683.
- 439 25. Shin D, Mukherjee R, Grewe D, Bojkova D, Baek K, Bhattacharya A, Schulz L, Widera  
440 M, Mehdipour AR, Tascher G, et al: **Papain-like protease regulates SARS-CoV-2 viral**  
441 **spread and innate immunity.** *Nature* 2020, **587**:657-662.
- 442 26. Liu G, Lee JH, Parker ZM, Acharya D, Chiang JJ, van Gent M, Riedl W, Davis-Gardner  
443 ME, Wies E, Chiang C, Gack MU: **ISG15-dependent activation of the sensor MDA5 is**  
444 **antagonized by the SARS-CoV-2 papain-like protease to evade host innate**  
445 **immunity.** *Nat Microbiol* 2021, **6**:467-478.
- 446 27. Eggermont J, Proudfoot NJ: **Poly(A) signals and transcriptional pause sites combine**  
447 **to prevent interference between RNA polymerase II promoters.** *EMBO J* 1993,  
448 **12**:2539-2548.
- 449 28. Ricardo-Lax I, Luna JM, Thao TTN, Le Pen J, Yu Y, Hoffmann HH, Schneider WM,  
450 Razoooky BS, Fernandez-Martinez J, Schmidt F, et al: **Replication and single-cycle**  
451 **delivery of SARS-CoV-2 replicons.** *Science* 2021, **374**:1099-1106.
- 452 29. Graham RL, Deming DJ, Deming ME, Yount BL, Baric RS: **Evaluation of a**  
453 **recombination-resistant coronavirus as a broadly applicable, rapidly**  
454 **implementable vaccine platform.** *Commun Biol* 2018, **1**:179.
- 455 30. Pannu J, Sandbrink JB, Watson M, Palmer MJ, Relman DA: **Protocols and risks: when**  
456 **less is more.** *Nat Protoc* 2022, **17**:1-2.
- 457 31. Xie X, Lokugamage KG, Zhang X, Vu MN, Muruato AE, Menachery VD, Shi PY:  
458 **Engineering SARS-CoV-2 using a reverse genetic system.** *Nat Protoc* 2021,  
459 **16**:1761-1784.

460

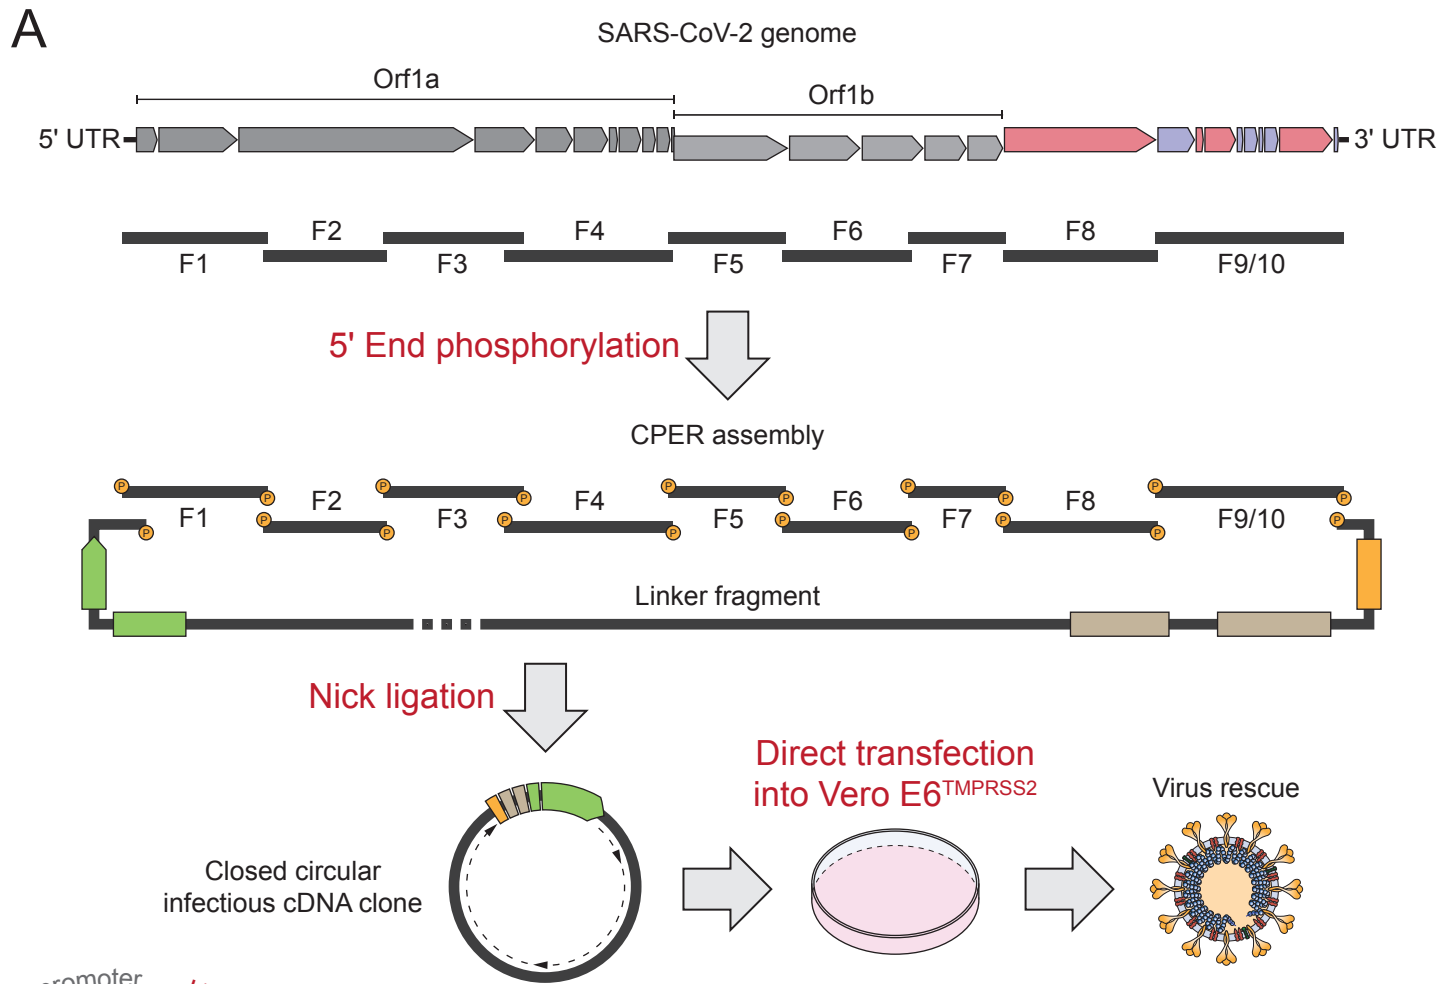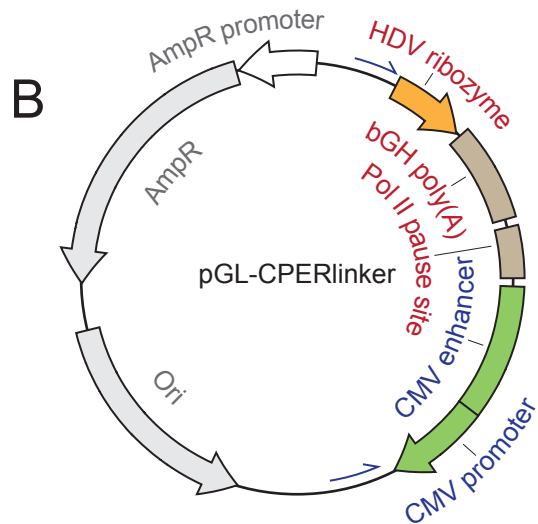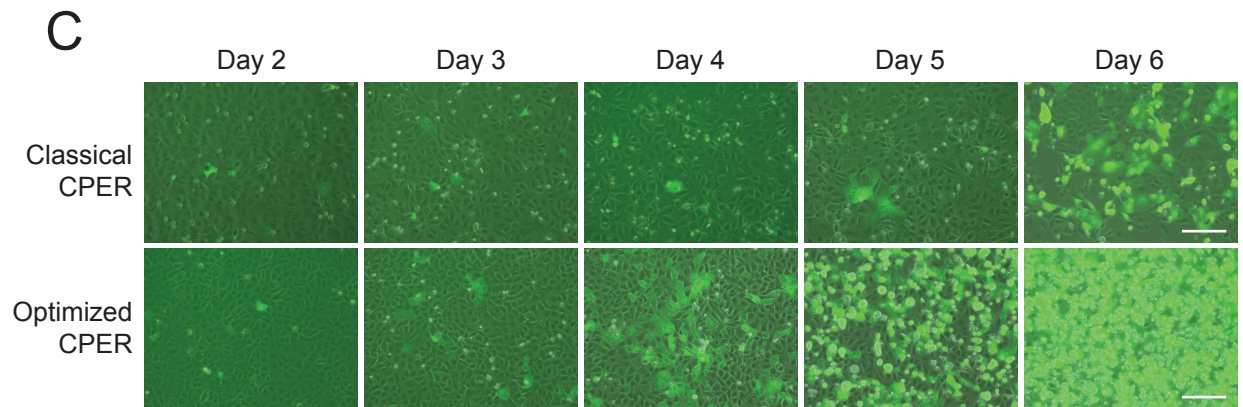

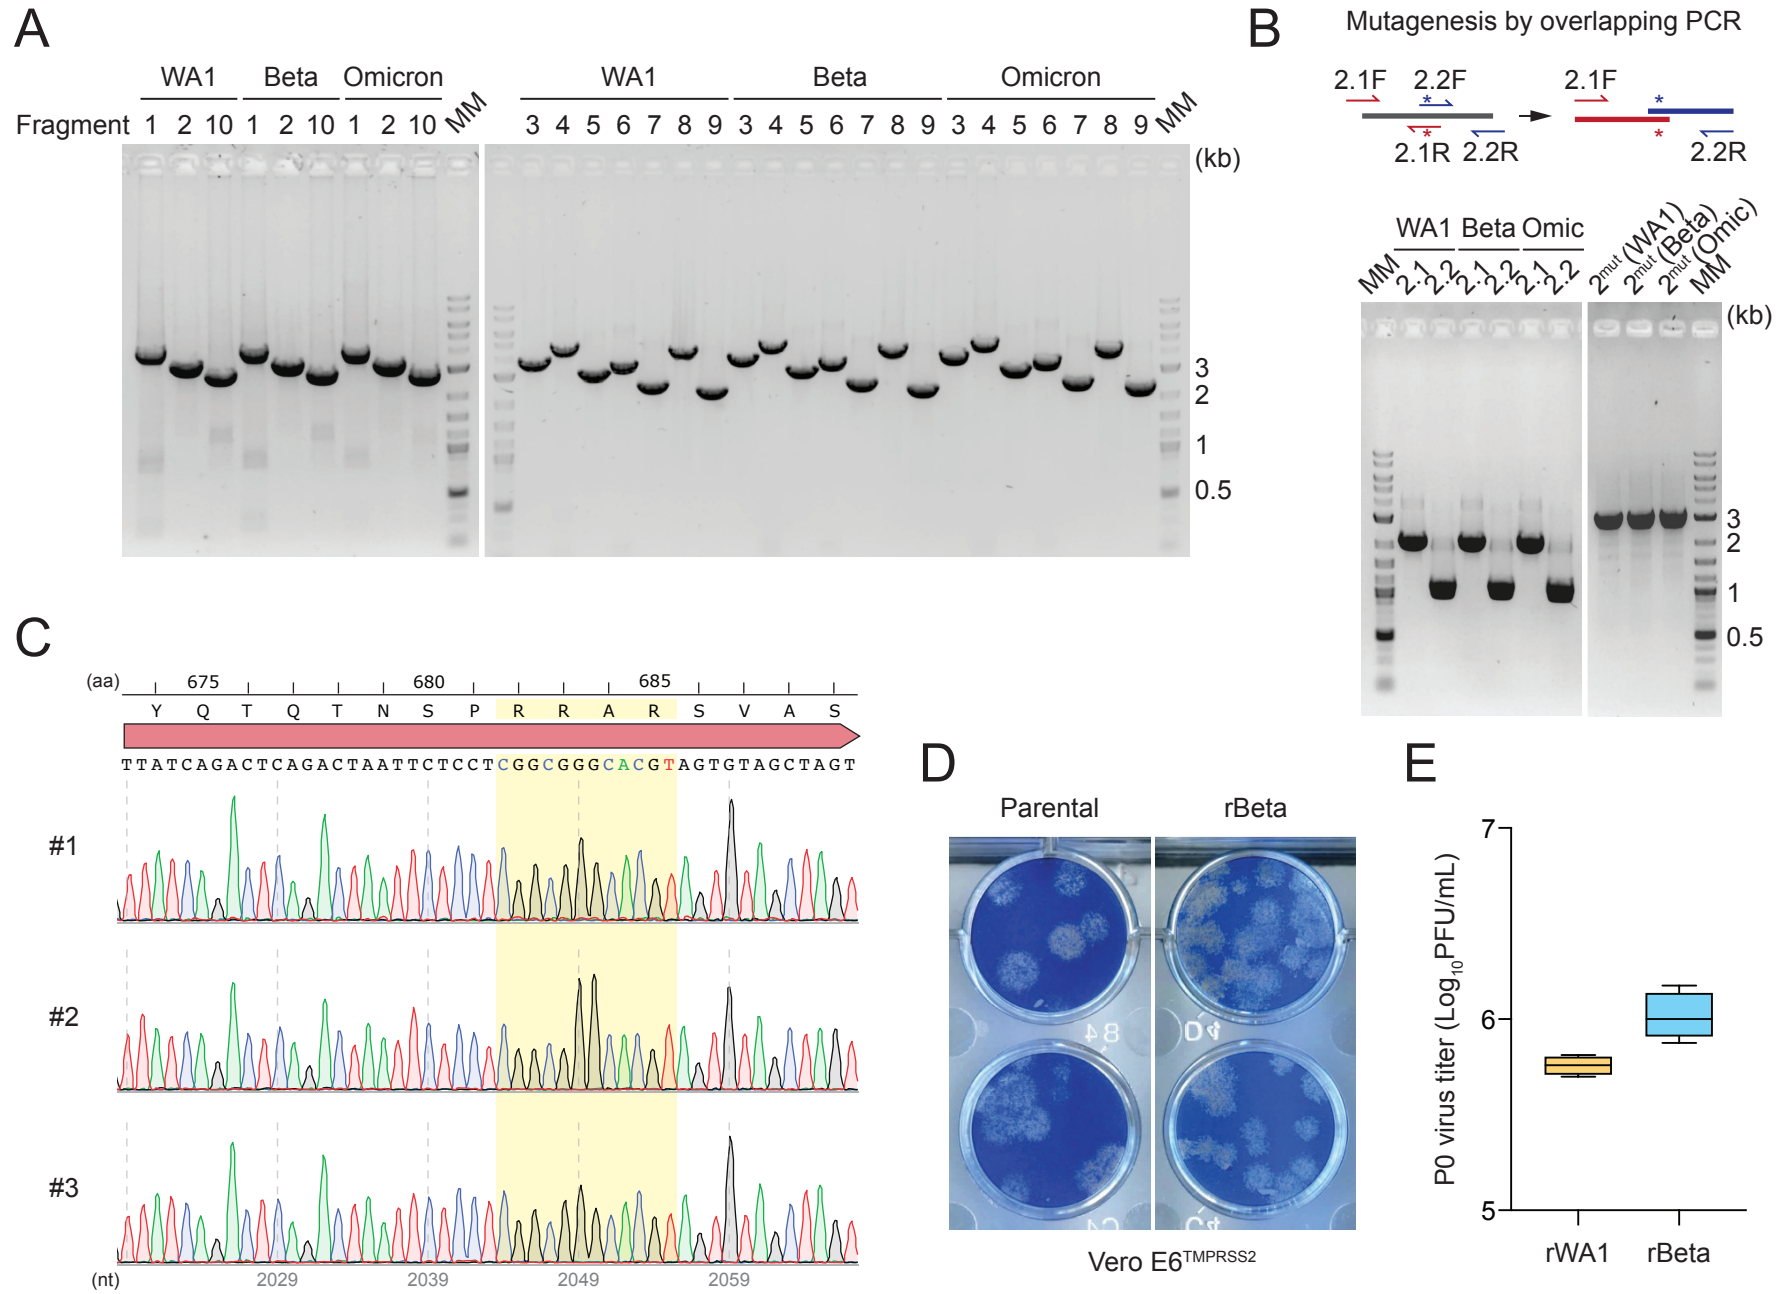

Source: http://biorxiv.org/content/10.1101/2022.11.26.518005v1.full.pdf
